# Supplementary material
Source: HighWire-hosted journal article supplement (https://heart.bmj.com/content/103/23/1874)
Supplement: inline-supplementary-material-1 [file inline-supplementary-material-1.pdf]

**Appendix Table 1 Medication Unavailability and Stock Outs in Prior Quarter - All Facilities**

|                                  | Kenya       |            |              | Uganda      |             |              | Total        |              |              |
|----------------------------------|-------------|------------|--------------|-------------|-------------|--------------|--------------|--------------|--------------|
|                                  | Ambulatory  | Hospitals  | All Kenya    | Ambulatory  | Hospitals   | All Uganda   | Ambulatory   | Hospitals    | Facilities   |
|                                  | (n=88)      | (n=55)     | (n=143)      | (N=101)     | (n=96)      | (n=197)      | (n=189)      | (n=151)      | (n=340)      |
| <b>Never Available</b>           |             |            |              |             |             |              |              |              |              |
| β blocker                        | 41 (47%)    | 1 (2%)     | 42 (29%)     | 34 (34%)    | 8 (8%)      | 42 (21%)     | 75 (40%)     | 9 (6%)       | 84 (25%)     |
| atenolol                         | 54 (61%)    | 3 (5%)     | 57 (40%)     | 63 (62%)    | 19 (20%)    | 84 (43%)     | 117 (62%)    | 22 (15%)     | 141 (42%)    |
| propranolol                      | 52 (59%)    | 25 (45%)   | 77 (54%)     | 39 (39%)    | 9 (9%)      | 48 (24%)     | 91 (48%)     | 34 (23%)     | 125 (37%)    |
| ACE inhibitor                    | 61 (69%)    | 27 (49%)   | 88 (62%)     | 77 (76%)    | 20 (21%)    | 97 (49%)     | 138 (51%)    | 47 (31%)     | 185 (55%)    |
| captopril                        | 68 (77%)    | 31 (56%)   | 99 (69%)     | 79 (78%)    | 21 (22%)    | 100 (51%)    | 147 (78%)    | 52 (34%)     | 199 (59%)    |
| lisinopril                       | 77 (88%)    | 40 (73%)   | 117 (82%)    | 85 (84%)    | 60 (63%)    | 155 (79%)    | 162 (86%)    | 100 (66%)    | 272 (81%)    |
| furosemide                       | 38 (43%)    | 1 (2%)     | 39 (27%)     | 28 (28%)    | 6 (6%)      | 34 (17%)     | 66 (35%)     | 7 (5%)       | 73 (22%)     |
| <b>All 3 medications</b>         | 67 (77%)    | 28 (51%)   | 96 (67%)     | 79 (78%)    | 22 (23%)    | 101 (51%)    | 147 (78%)    | 50 (33%)     | 197 (58%)    |
| <b>Minor (1-day) stock-outs</b>  |             |            |              |             |             |              |              |              |              |
| β blocker                        | 10/47 (21%) | 2/54 (4%)  | 12/101 (12%) | 7/67 (10%)  | 8/88 (9%)   | 15/155 (10%) | 17/114 (15%) | 10/142 (7%)  | 27/256 (11%) |
| atenolol                         | 7/34 (21%)  | 5/52 (10%) | 12/86 (14%)  | 14/36 (39%) | 22/77 (29%) | 36/113 (31%) | 21/70 (30%)  | 27/129 (21%) | 48/199 (24%) |
| propranolol                      | 9/39 (23%)  | 1/30 (3%)  | 10/69 (15%)  | 9/60 (15%)  | 7/87 (8%)   | 16/147 (11%) | 18/99 (18%)  | 8/117 (7%)   | 26/216 (12%) |
| ACE inhibitor                    | 7/27 (26%)  | 7/28 (25%) | 14/55 (25%)  | 9/24 (38%)  | 10/76 (13%) | 19/100 (19%) | 16/51 (31%)  | 17/104 (16%) | 33/155 (22%) |
| captopril                        | 6/20 (30%)  | 8/24 (33%) | 14/44 (32%)  | 9/22 (41%)  | 16/75 (21%) | 25/97 (26%)  | 15/42 (36%)  | 24/99 (24%)  | 39/141 (28%) |
| lisinopril                       | 1/11 (9%)   | 5/15 (33%) | 6/26 (23%)   | 2/6 (33%)   | 8/36 (22%)  | 10/42 (24%)  | 3/17 (18%)   | 13/51 (25%)  | 16/68 (25%)  |
| furosemide                       | 8/50 (16%)  | 2/54 (4%)  | 10/104 (10%) | 13/73 (18%) | 8/90 (9%)   | 21/163 (13%) | 21/123 (17%) | 10/144 (7%)  | 31/267 (12%) |
| <b>Any medication</b>            | 6/21 (29%)  | 9/27 (33%) | 15/48 (32%)  | 10/22 (45%) | 18/74 (24%) | 28/96 (29%)  | 16/43 (37%)  | 27/101 (27%) | 43/144 (31%) |
| <b>Major (8+ day) stock-outs</b> |             |            |              |             |             |              |              |              |              |
| β blocker                        | 7/47 (15%)  | 0/54 (0%)  | 7/101 (7%)   | 4/67 (6%)   | 3/88 (3%)   | 7/155 (5%)   | 11/114 (10%) | 3/142 (2%)   | 14/256 (6%)  |
| atenolol                         | 5/34 (15%)  | 3/52 (6%)  | 8/86 (9%)    | 6/36 (17%)  | 9/77 (12%)  | 15/113 (13%) | 11/70 (16%)  | 12/129 (9%)  | 23/199 (12%) |
| propranolol                      | 6/69 (9%)   | 1/30 (3%)  | 7/69 (11%)   | 4/60 (7%)   | 2/87 (2%)   | 6/147 (4%)   | 10/99 (10%)  | 3/117 (3%)   | 13/216 (6%)  |
| ACE inhibitor                    | 5/27 (19%)  | 6/28 (21%) | 11/55 (20%)  | 5/24 (21%)  | 7/76 (9%)   | 12/100 (12%) | 10/51 (20%)  | 13/104 (13%) | 23/155 (15%) |
| captopril                        | 4/20 (20%)  | 7/24 (29%) | 11/44 (25%)  | 5/22 (23%)  | 8/75 (11%)  | 13/97 (13%)  | 9/42 (21%)   | 15/99 (15%)  | 24/141 (17%) |
| lisinopril                       | 1/11 (9%)   | 4/15 (27%) | 5/26 (19%)   | 0/6 (0%)    | 2/36 (6%)   | 2/42 (5%)    | 1/17 (6%)    | 6/51 (12%)   | 7/68 (11%)   |
| furosemide                       | 6/50 (12%)  | 1/54 (2%)  | 7/104 (7%)   | 4/73 (5%)   | 5/90 (6%)   | 9/163 (6%)   | 10/123 (8%)  | 6/144 (4%)   | 16/267 (6%)  |
| <b>Any medication</b>            | 4/21 (19%)  | 6/27 (22%) | 10/48 (21%)  | 6/22 (27%)  | 10/74 (14%) | 16/96 (17%)  | 10/43 (23%)  | 16/101 (16%) | 26/144 (19%) |
